# Supplementary material
Source: Royal Society of Chemistry journal article supplement (https://www.rsc.org/suppdata/p2/1999/1835/905444h.doc)
Supplement: Supplementary file 1 [file 905444h.doc]

Correspondence should be sent to:

Rolf Carlson, Department of Chemistry, Faculty of Science, University of Tromsø, NO-9037 Tromsø, Norway.

E-mail: Rolf.carlson@chem.unit.no

Tlf.: +47 77 64 40 68

Fax.: +47 77 64 47 37

**Supplementary material for**

**1,2- *versus* 1,4-Addition to á-donor-cyclopenten-1-ones; a comparison of calculated and experimental data. General procedure for treatment of á-donor-2-cyclopenten-1-ones with methylithium**

Hanna S. H. Gautun, Rolf Carlson* and Per N. Skancke

Department of Chemistry, Faculty of Science, University of Tromsø, NO-9037 Tromsø, Norway.

A solution of MeLi (1.65 M in diethylether, 1.0 eq) in THF (2 ml) was cooled to -78C. To this mixture was added a cold (-78 C) solution of **1a-g** (0.5 mmol) in THF (3 ml) via canula. The reaction was stirred at -78 C for 1h. At this time, a sample (10 μl) for GlC analysis was withdrawn. After 1.5 h total reaction time the mixture was lifted out of the cooling bath and added water (3 ml) immediately. The mixture was stirred at room temperature for 10 min and then extracted with CH2Cl2 (3 x 5 ml). The combined organic layers were washed with satd. NaCl solution (4 ml) and dried (MgSO4). Evaporation of the solvent under reduced pressure gave a crude product which was analyzed by GLC and 1H NMR, and subsequently purified by flash chromatography.

**Treatment of 2-cyclopenten-1-one (1a) with MeLi.** Treatment of **1a** (100 μl, 1.24 mmol) with MeLi according to the general procedure given above gave, after drying with MgSO4, a crude product solution. Unfortunately, evaporation of the solvents under reduced pressure lead to loss of the product. GLC-MS analysis of the crude product solution, indicated the presence of unreacted **1a** (5%) in addition to 1-methyl-2-cyclopenten-1-ol (**3a**) (95%). MS *m/z* 98 (*M*, 2%), 83 (82), 81 (10), 80 (79), 79 (100), 78 (15), 77 (66), 74 (5), 65 (22), 63 (20), 62 (7), 55 (33), 54 (7), 53 (26), 52 (30), 51 (58), 50 (49), 49 (7), 43 (46), 42 (5), 43 (46), 42 (6), 41 (17).

**Treatment of 2-chloro-2-cyclopenten-1-one (1b) with MeLi**. Treatment of **1b** (0.0930 g, 0.80 mmol) with MeLi according to the general procedure given above afforded 0.0873 g of a brown oil. Purification by flash chromatography (Et2O-pentane, 4 : 6) gave 2-chloro-1-methyl-2-cyclopenten-1-ol (**3b**) (0.0296 g, 28.0% yield) as a colorfree oil. HRMS found: *M* 132.0345. Calc. for C6H9ClO: 132.0342; IR v(neat) 3340m, 2960m, 2920m, 2840m, 1625m, 1450m, 1430m, 1400m, 1365m, 1310m, 1255w, 1180m, 1175m, 1140m, 1090m, 1010m, 990m, 980m, 935m, 910m, 890m, 835m, 780w, 730m, 710w, 600m cm-1; 1H NMR δ 1.39 (3H, s), 1.89 (1H, br.s), 2.04-2.18 (1H, m), 2.21-2.31 (1H, m), 2.37-2.46 (1H, m), 5.77 (1H, t, *J* 2.56); 13C NMR δ 25.8, 27.5, 38.4, 82.0, 127.6, 138.6; MS *m/z* 134 (*M*+2, 8%), 132 (*M*, 32), 120 (5), 119 (89), 117 (100), 115 (5), 97 (23), 91 (6), 89 (18), 82 (5), 81 (32), 79 (27), 77 (27), 75 (8), 73 (8), 69 (12), 67 (9), 65 (8), 63 (10), 62 (6), 61 (7), 55 (20), 54 (10), 53 (68), 52 (12), 51 (41), 50 (21), 49 (7), 43 (63), 42 (10), 41 (26).

**Treatment of 2-bromo-2-cyclopenten-1-one (1c) with MeLi.** Treatment of **1c** (0.1383 g, 0.86 mmol) with MeLi according to the general procedure given above afforded 0.1154 g of a brown oil. Purification by flash chromatography (Et2O-pentane, 3 : 7) gave 2-bromo-1-methyl-2-cyclopenten-1-ol (**3c**) (0.0544 g, 35.8%) as a light yellow oil. HRMS found: *M* 176.9734. Calc. for C6H9BrO: 176.9738; IR vmax (neat) 3350br.s, 2950m, 2840m, 1610w, 1440w, 1360w, 1310m, 1250w, 1180m, 1130m, 1090s, 1010w, 990w, 960w, 930w, 910w, 875w, 830w, 780w, 700w cm-1; 1H NMR δ 1.36 (3H, s), 1.89 (1H, br.s), 2.03-2.18 (2H, m), 2.20-2.30 (1H, m), 2.36-2.45 (1H, m, 5.39 (1H, t, *J* 2.56); 13C NMR δ 26.5, 29.5, 37.7, 82.8, 130.1, 132.2; MS *m/z* 178 (*M*+2, 27%), 176 (27), 164 (12), 163 (100), 161 (91), 159 (4), 135 (5), 133 (6), 119 (5), 97 (27), 96 (5), 95 (10), 83 (10), 82 (67), 81 (52), 80 (17), 79 (50), 78 (12), 77 (47), 74 (5), 69 (24), 67 (15), 66 (5), 65 (12), 63 (13), 62 (6), 57 (6), 55 (35), 54 (16), 53 (54), 52 (22), 51 (49), 50 (36), 49 (5), 47 (5), 44 (8), 43 (52), 42 (16), 41 (36).

**Treatment of 2-methoxy-2-cyclopenten-1-one (1d) with MeLi.** Treatment of **1d** (0.1068 g, 0.95 mmol) with MeLi according to the general procedure given above afforded 0.0824 g of a yellow oil. GLC and 1H NMR analysis of the crude product showed the presence of **1d** (16%) and 1-methyl-2-methoxy-2-cyclopenten-1-ol (**3d**) (82%). **3d** gradually reacted to give an unstable intermediate and a final product **15**, which was identified as 2-methyl-2-cyclopentenone by co-chromatography with an authentic sample as well as 1H NMR, 13C NMR and mass spectra.

Spectroscopic data obtained for 1-methyl-2-methoxy-2-cyclopenten-1-ol (**3d**): 1H NMR δ 1.35 (3H, s), 1.94-2.02 (2H, m), 2.10-2.19 (1H, m), 2.26-2.46 (1H, m), 3.62 (3H, s), 4.51 (1H, t, *J* 2.56); MS *m/z* 129 (*M*+1, 2%), 128 (*M*, 26), 114 (8), 113 (100), 111 (5), 110 (32), 109 (10), 97 (3), 96 (6), 95 (14), 81 (12), 79 (9), 77 (5), 67 (19), 65 (6), 55 (11), 43 (15).

Spectroscopic data obtained for 2-methyl-2-cyclopentenone (**15**): 1H NMR δ 1.75 (3H, s), 2.34-2.39 (2H, m), 2.51-2.56 (2H, m), 7.31-7.32 (1H, m); 13C NMR δ 10.2, 26.4, 34.3, 142.0, 158.4, 210.0; MS *m/z* 97 (*M*+1, 8%), 96 (*M*, 92), 95 (9), 81 (5), 68 (18), 67 (100), 66 (7), 65 (11), 63 (6), 54 (5), 53 (47), 52 (7), 51 (14), 50 (10), 42 (15), 41 (17), 40 (18).

**Treatment of 2-pyrrolidinyl-2-cyclopenten-1-one (1e) with MeLi.** A solution of **1e** (0.0624 g, 0.41 mmol) in THF (3 ml) was added to a solution of MeLi according to the general procedure given above. GLC-MS analysis of a sample withdrawn from the reaction mixture after 1 h showed three components; **1e** (38.0%), 1-methyl-2-pyrrolidinyl-2-cyclopenten-1-ol (**3e**) (49.3%) and 2-hydroxy-2-methylcyclopentanone (**14**) (12.7%). After 2.0 h total reaction time the mixture was worked up according to the general procedure. GLC analysis of the crude product solution after drying (MgSO4) revealed only two components; **1e** (38.1%) and **14** (61.9%).

Spectroscopic data obtained for 1-methyl-2-pyrrolidinyl-2-cyclopenten-1-ol (**3e**): MS *m/z* 168 (*M*+1, 3%), 167 (*M*, 37), 166 (37), 152 (11), 150 (15), 149 (32), 148 (32), 139 (9), 138 (5), 136 (5), 134 (30), 124 (35), 122 (10), 120 (13), 111 (48), 110 (43), 109 (5), 108 (27), 106 (15), 97 (13), 96 (26), 95 (7), 94 (14), 93 (9), 92 (5), 91 (8), 84 (6), 83 (45), 82 (16), 81 (19), 80 (22), 79 (23), 78 (10), 77 (26), 71 (7), 70 (48), 69 (16), 68 (52), 67 (26), 66 (13), 65 (15), 58 (7), 56 (13), 55 (38), 54 (40), 53 (29), 52 (12), 51 (14), 50 (5), 44 (34), 43 (69), 42 (46), 41 (100).

Spectroscopic data obtained for 2-hydroxy-2-methyl-cyclopentanone (**14**): MS *m/z* 114 (*M*, 7%), 86 (14), 71 (6), 58 (100), 57 (6), 55 (5), 44 (5), 43 (63), 42 (12), 41 (10).

**Treatment of 2-phenylthio-2-cyclopenten-1-one (1f) with MeLi.** Treatment of **1f** (0.0941 g, 0.50 mmol) with MeLi according to the general procedure given above afforded 0.0963 g of a yellow oil. Purification by flash chromatography (Et2O-pentane, 4 : 6) gave 1-methyl-2-phenylthio-2-cyclopenten-1-ol (**3f**) (0.0772 g, 75.7% yield) of as a yellow oil. HRMS found: *M* 206.0770. Calc. for C12H14OS: 206.0765; IR vmax (neat) 3400s, 3005m, 2995s, 2992s, 2985m, 1695w, 1595m, 1580m, 1470s, 1435m, 1340m, 1305m, 1180m, 1125m, 1080s, 1020m, 1000w, 960m, 925m, 910m, 890w, 820w, 780w, 745s, 690s cm-1; 1H NMR δ 1.39 (3H, s), 1.83 (1H, br.s), 2.03-2.17 (2H, m), 2.23-2.34 (1H, m), 2.39-2.50 (1H, m), 5.61 (1H, t, *J* 2.56), 7.21-7.35 (3H, m), 7.41-7.50 (2H, m); 13C NMR δ 26.6, 29.4, 40.2, 84.2, 127.5, 129.2, 132.0, 132.6, 134.2, 143.3; MS *m/z* 207 (*M*+1, 2%), 206 (*M*, 15), 191 (15), 190 (5), 189 (15), 188 (100), 187 (29), 174 (6), 173 (49), 172 (7), 171 (8), 161 (3), 155 (20), 154 (7), 153 (10), 149 (5), 147 (12), 134 (5), 129 (12), 128 (9), 121 (4), 117 (5), 115 (11), 111 (20), 110 (34), 109 (17), 97 (9), 91 (8), 85 (6), 84 (6), 79 (31), 78 (43), 77 (79), 71 (16), 69 (12), 67 (7), 66 (11), 65 (20), 63 (6), 59 (5), 58 (5), 53 (13), 52 (9), 51 (39), 50 (11), 45 (19), 43 (15).

**Treatment of 2-phenylseleno-2-cyclopenten-1-one (1g) with MeLi.** Treatment of **1g** (0.1048 g, 0.44 mmol) with MeLi according to the general procedure given above afforded 0.0883 g of an orange oil. Purification by flash chromatography (Et2O-pentane, 1 : 3) gave 1-methyl-2-phenylseleno-2-cyclopenten-1-ol (**3g**) (0.0667 g, 59.6% yield) as a yellow oil. HRMS found: *M*+1 254.0222. Calc. for C12H14O80Se: 254.0210; IR vmax (neat) 3400br.s, 3050w, 2950m, 2910m, 2840m, 1700m, 1680m, 1590m, 1570m, 1470m, 1440s, 1360m, 1300m, 1285w, 1180m, 1120m, 1080s, 1020m, 1010w, 960w, 930m, 910m, 875w, 830w, 780w cm-1; 1H NMR δ 1.35 (3H, s), 1.82 (1H, br.s), 2.01-2.17 (2H, m), 2.27-2.38 (1H, m), 2.43-2.54 (1H, m), 2.58 (1H, t, *J* 2.56), 7.23-7.28 (3H, m), 7.53-7.58 (2H, m); 13C NMR δ 27.1, 30.6, 39.5, 84.9, 127.5, 129.3, 129.8, 133.3, 136.9, 140.2; MS *m/z* 254 (*M*+1, 2%), 252 (*M*-1, 1), 159 (5), 157 (16), 155 (14), 153 (7), 129 (5), 128 (6), 119 (9), 117 (12), 115 (13), 102 (5), 97 (9), 95 (5), 93 (5), 91 (7), 82(4), 81 (8), 79 (12), 78 (41), 77 (100), 76 (5), 75 (7), 74 (9), 65 (5), 57 (7), 55 (7), 53 (19), 52 (12), 51 (76), 50 (27), 43 (65).

**General procedure for treatment of á-donor-2-cyclopenten-1-ones with Me2CuLi**

A suspension of CuI (2 eq) in THF (6 ml) was cooled to -15 C and added a solution of MeLi in diethylether (1.71 M, 4 eq). The mixture was stirred at -15 C until all the yellow, solid material was dissolved. The resulting clear, colourfree cuprate solution was cooled to -78 C and added a cold (-78 C) solution of **1a-g** (0.6 mmol) in THF (3 ml) via canula. The reaction was stirred at -78 C for 1h, at which time a sample (10 μl) was withdrawn for GLC analysis. After a total reaction time of 1.5 h, the reaction was lifted out of the coolingbath and added aqueous NH3 (2M, 3 ml), aqueous NH4Cl (10 W%, 3 ml) and diethylether (10 ml). The mixture was stirred vigorously in air at roomtemperature until all precipitated material had dissolved. The phases were separated and the deep blue aqueous layer extracted with diethylether (2 x 10 ml). The combined organic layers were washed with satd. NaCl solution (10 ml) and dried (MgSO4). Evaporation of the solvent under reduced pressure afforded a crude product which was analyzed by GLC and 1H NMR prior to flash chromatography.

**Treatment of 2-cyclopenten-1-one (1a) with Me2CuLi.** Treatment of **1a** (100 μl, 1.24 ml) with Me2CuLi according to the general procedure given above afforded, after drying with MgSO4, a crude product solution. Unfortunately, evaporation of the solvents under reduced pressure lead to loss of the product. Analysis of the crude product solution by GLC-MS and co-chromatography with an authentic sample indicated, however, the presence of 3-methyl-2-cyclopenten-1-one (**4a**) (>95%). MS *m/z* 99 (*M*+1, 4%), 98 (*M*, 58), 83 (10), 70 (17), 69 (100), 56 (71), 55 (92), 53 (13), 51 (8), 50 (6), 43 (12), 42 (86), 41 (67).

**Treatment of 2-chloro-2-cyclopenten-1-one (1b) with Me2CuLi.** Treatment of **1b** (0.0972 g, 0.83 mmol) with Me2CuLi according to the general procedure described above afforded 0.0968 g of an orange oil. Purification by flash chromatography (Et2O-pentane, 1 : 4) afforded a mixture of *cis* and *trans* 3-methyl-2-chloro-2-cyclopenten-1-one (**4b*cis*** + **4b*trans***) (0.0592 g, 53.6% yield) as a colourfree oil. The ratio of **4b*cis*** : **4b*trans*** was estimated to 3.9 : 1 by 1H NMR. HRMS found: *M* 132.0344. Calc. for C6H935ClO: 132.0342; IR vmax (neat) 2950m, 2870m, 1760s, 1455m, 1400m, 1380m, 1235w, 1155m, 1125m, 1070m, 985w, 930m, 915m, 870m, 850w, 820w, 730m, 700w cm-1; 1H NMR δ 1.13 (3H*trans*, d, *J* 6.59), 1.24 (3H*trans*, d, *J* 6.59), 1.47-1.62 (1H*cis*, m), 1,77-1.88 (1H*trans*, m), 1.98-2.08 (1H*trans*, m), 2.10-2.51 (4H*cis* + 3H*trans*, m), 3.71 (1H*cis*, d, *J* 10.25), 4.10 (1H*trans*, d, *J* 5.49); 13C NMR: **4b*cis***: δ 18.0, 27.4, 35.4, 41.2, 67.0, 210.8; **4b*trans***: δ 14.8, 26.8, 34.7, 36.8, 64.3, 210.5; MS *m/z* 134 (*M*+2, 9%), 132 (*M*, 23), 97 (35), 91 (8), 89 (6), 79 (7), 78 (28), 77 (6), 76 (49), 75 (18), 73 (5), 69 (20), 68 (22), 67 (12), 65 (6), 63 (8), 62 (7), 61 (6), 56 (25), 55 (98), 54 (12), 53 (55), 52 (10), 51 (34), 50 (26), 49 (21), 48 (16), 43 (6), 42 (71), 41 (100);

**Treatment of 2-bromo-2-cyclopenten-1-one (1c) with Me2CuLi.** Treatment of **1c** ( 0.0957 g, 0.59 mmol) with Me2CuLi according to the general procedure described above afforded 0.0918 g of a yellow oil. Purification by flash chromatography (Et2O-pentane, 1 : 4) afforded a mixture of *cis* and *trans* 3-methyl-2-bromo-2-cyclopenten-1-one (**4c*cis*** + **4c*trans***) (0.0561 g, 53.3% yield) as a colorfree oil. The ratio of **4c*cis*** : **4c*trans*** was estimated to 2 : 1 by 1H NMR. HRMS found: *M+* 175.9833. Calc. for C6H979BrO: 175.9837; IR vmax (neat) 2950m, 2910m, 2870m, 1755s, 1450m, 1400w, 1370w, 1270w, 1230w, 1205w, 1150m, 1060w, 980w, 920w, 860w, 835w, 800w cm-1; 1H NMR δ 1.16 (3H*trans*, d, *J* 6.59), 1.21 (3H*cis*, d, *J* 6.22), 1.51-1.63 (1H*cis*, m), 1.96-2.06 (1H*trans*, m), 2.56-3.07 (4H*cis* + 4H*trans*, m), 3.85 (1H*cis*, d, *J* 9.15), 4.20 (1H*trans*, d, *J* 2.56); 13C NMR **4c*cis***: δ 18.3, 28.5, 35.3, 41.5, 56.8, 210.8; **4c*trans***: δ 17.0, 26.6, 35.5, 37.0, 57.6, 210.7; MS *m/z* 178 (*M*+2, 4%), 176 (*M*, 4), 121 (5), 119 (6), 97 (49), 81 (12), 79 (12), 69 (35), 68 (5), 67 (12), 56 (13), 55 (100), 53 (36), 52 (7), 51 (16), 50 (12), 42 (29), 41 (83).

**Treatment of 2-methoxy-2-cyclopenten-1-one (1d) with Me2CuLi.** Treatment of **1d** (0.1014 g, 0.90 mmol) with Me2CuLi according to the general procedure given above afforded a dark yellow oil (0.0855 g, 89% pure by GLC), which was identified by 1H NMR as starting material, **1d**.

**Treatment of 2-pyrrolidinyl-2-cyclopenten-1-one (1e) with Me2CuLi.** Treatment of **1e** (0.1031 g, 0.68 mmol) with Me2CuLi according to the general procedure given above afforded a black oil (0.0568 g, 85% pure by GLC), which was identified by 1H NMR as starting material, **1e**.

**Treatment of 2-phenylthio-2-cyclopenten-1-one (1f) with Me2CuLi.** Treatment of **1f** (0.1132 g, 0.60 mmol) with Me2CuLi according to the general procedure described above afforded 0.1030 g of a light brown oil. Purification by flash chromatography (Et2O-pentane, 15 : 85) afforded a mixture of *cis* and *trans* 3-methyl-2-phenylthio-2-cyclopenten-1-one (**4f*cis*** + **4f*trans***) (0.0629 g, 51.3% yield) as a colorfree oil. The ratio of **4f*cis*** : **4f*trans*** was estimated to 7.8 : 1 by 1H NMR. HRMS found: *M+* 206.0745. Calc. for C12H14OS 206.0765; IR vmax (neat) 3150w, 2950m, 2850m, 1745s, 1575m, 1475m, 1450m, 1435m, 1400w, 1370w, 1300w, 1280w, 1220w, 1145m, 1080w, 1065m, 1020w, 980w, 940w, 925w, 865w, 820w, 745m, 690m, 680w cm-1; 1H NMR δ 1.20 (3H*trans*, d, *J* 6.96), 1.22 (3H*cis*, d, *J* 6.59), 1.46-1.58 (1H*cis*, m), 1.77-1.89 (1H*trans*, m), 1.96-2.25 (3H*cis* + 2H*trans*, m), 2.32-2.43 (1H*cis*, m), 2.47-2.61 (2H*trans*, m), 2.98 (1H*cis*, d, *J* 9.89), 3.66 (1H*trans*, d, *J* 6.59), 7.20-7.32 (3H*cis* + 3H*trans*, m), 7.43-7.49 (2H*cis* + 2H*trans*, m); 13C NMR **4f*cis***: δ 19.1, 28.8, 36.9, 37.5, 61.0, 127.9, 129.0, 133.1, 133.5, 214.6; **4f*trans***: δ 15.6, 28.1, 35.3, 35.7, 59.1, 127.5, 129.1, 132.0, 133.7, 212.5; MS *m/z* 207 (*M*+1, 2%), 206 (*M*, 23), 150 (15), 149 (15), 136 (14), 135 (15), 121 (87), 115 (5), 110 (12), 109 (100), 105 (5), 97 (5), 91 (7), 85 (12), 83 (5), 82 (11), 83 (6), 78 (20), 77 (75), 75 (6), 74 (8), 72 (6), 71 (12), 69 (41), 67 (10), 66 (7), 65 (40), 63 (7), 59 (6), 58 (6), 56 (19), 55 (29), 54 (16), 53 (29), 52 (9), 51 (46), 50 (21);

**Treatment of 2-phenylseleno-2-cyclopenten-1-one (1g) with Me2CuLi.** Treatment of **1g** (0.1423 g, 0.60 mmol) with Me2CuLi according to the general procedure described above afforded 0.1243 g of an orange oil. Purification by flash chromatography (Et2O-pentane, 1 : 3) afforded a mixture of *cis* and *trans* 3-methyl-2-phenylseleno-2-cyclopenten-1-one (**4g*cis*** + **4g*trans***) (0.1156 g, 71.6% yield) as a colorfree oil. The ratio of **4g*cis*** : **4g*trans*** was estimated to 9.4 : 1 by 1H NMR. *Elem. anal.* found C, 57.0; H, 5.8. Calc. for C12H14OSe: C, 57.0; H, 5.6; IR vmax (neat) 3050w, 2950s, 2850m, 1735br.s, 1575m, 1475m, 1457m, 1440m, 1400m, 1375s, 1300w, 1280w, 1260w, 1220w, 1180w, 1140m, 1060m, 1020m, 1000w, 985w, 795w, 740m, 690m, 679w cm-1; 1H NMR δ 1.16 (3H*cis*, d, *J* 6.59), 1.23 (3H*trans*, d, *J* 6.59), 1.45-1.56 (1H*cis*, m), 1.66-1.78 (1H*trans*, m), 1.98-2.21 (3H*cis* + 1H*trans*, m), 2.25-2.43 (1H*cis* + 2H*trans*, m), 2.48-2.58 (1H*trans*, m), 3.16 (1H*cis*, d, *J* 6.56), 3.75 (1H*trans*, d, *J* 5.86), 7.23-7.32 (3H*cis* + 3H*trans*), 7.54-7.60 (2H*cis* + 2H*trans*, m); 13C NMR **4g*cis***: δ 19.4, 29.2, 36.6, 37.8, 55.0, 127.7, 128.4, 129.2, 135.6, 215.0; **4g*trans***: δ 17.5, 28.9, 36.0, 36.3, 55.5, 127.5, 129.2, 135.3, 212.6; MS *m/z* 256 (*M*+3, 7%), 254 (5), 254 (42), 252 (20), 251 (7), 250 (5), 198 (5), 184 (10), 183 (12), 182 (5), 181 (8), 159 (12), 158 (19), 157 (59), 156 (13), 155 (32), 154 (15), 153 (13), 131 (9), 130 (6), 129 (7), 119 (5), 118 (10), 117 (30), 116 (7), 115 (17), 107 (6), 105 (8), 104 (5), 97 (26), 92 (9), 91 (13), 81 (12), 80 (7), 78 (42), 77 (87), 76 (10), 75 (8), 74 (7), 69 (60), 67 (15), 65 (14), 56 (5), 55 (38), 54 (9), 53 (29), 52 (9), 51 (65), 50 (26), 43 (7), 42 (20), 41 (100).

**General procedure for treatment of α-donor-2-cyclopenten-1-ones** **with cyanomethyllithium**

A solution of acetonitrile (1 eq) in THF (2 ml) was cooled to -78 C and added a solution of methyllithium in diethylether (1.65 M, 1 eq). The mixture was stirred for 15 min. A precooled solution (-78 C) of **1a-g** (0.6 mmol) in THF (3 ml) was then transferred into the cyanomethyllithium solution via canula. The reaction was kept stirring at -78 C and monitored by GLC after 1 h. After 1.5 h the reaction was lifted out of the cooling bath, added aqueous NH4Cl (satd., 1 ml) and stirred vigorously for 15 min. The organic solvent was evaporated before the residue was added more aqueous NH4Cl (satd., 3 ml) and extracted with ethyl acetate (3 x 5 ml). The combined organic layers were washed with satd. NaCl solution (4 ml) and dried (MgSO4). Removal of the solvent under reduced pressure gave a crude product which was analyzed by GLC and 1H NMR before it was purified by flash chromatography.

**Treatment of cyclopenten-1-one (1a) with cyanomethyllithium.** Treatment of **1a** (0.20 ml, 2.44 mmol) with cyanomethyllithium according to the general procedure afforded 0.2412 g of a yellow oil. Flash chromatography (Et2O-hexane, 7 : 3) gave 1-cyanomethyl-2-cyclopenten-1-ol (**5a**) (0.1301 g, 43.3% yield) and 3-cyanomethylcyclopentanone (**6a**) (0.0911 g, 30.0% yield) as colorfree oils.

Spectroscopic data for 1-cyanomethyl-2-cyclopenten-1-ol (**5a**): HRMS found: *M*-H2O 105.0575. Calc. for C7H7N: 105.0579; IR vmax (neat) 3420s, 3060m, 2940s, 2850s, 2250m, 1730w, 1660m, 1615m, 1450m, 1410m, 1380m, 1360m, 1290m, 1230m, 1190m, 1110m, 1070s, 970m, 935m, 885w, 750m, 720m cm-1; 1H NMR δ 2.00 (1H, ddd, *J* 4.76, *J* 8.42, *J* 13.91), 2.13 (1H, ddd, *J* 4.76, *J* 8.42, *J* 13.91), 2.36 (1H, br.s), 2.35-2.45 (1H, part of an AB system, *J* 16.48), 2.68 (1H, part of an AB system, *J* 16.48), 5.73-5.77 (1H, m), 6.00-6.03 (1H, m); 13C NMR δ 29.8, 31.3, 37.9, 83.3, 118.0, 136.5; MS *m/z* 105 (*M*-18, 5%), 104 (5), 84 (4), 83 (70), 82 (12), 81 (8), 78 (8), 63 (8), 55 (37), 54 (11), 53 (19), 52 (17), 51 (24), 50 (17), 43 (10), 42 (10), 41 (85), 40 (100);

Spectroscopic data for 3-cyanomethylcyclopentanone (**6a**): HRMS found: *M* 123.0681. Calc for C7 H9NO: 123.06840; IR vmax (neat) 3450w, 2960m, 2940m, 2250w, 1735s, 1600w, 1460w, 1420m, 1400m, 1360w, 1280w, 1245w, 1160m, 1140m, 1050w cm-1; 1H NMR δ 1.66-1.79 (1H, m), 1.94-2.06 (1H, m), 2.17-2.33 (2H, m), 2.34-2-42 (1H, m), 2.44-2.59 (4H, m); 13C NMR δ 22.5 28.7, 30.4, 33.5, 38.3, 43.7, 117.8, 216.1; MS *m/z* 123 (*M*, 20%), 94 (10), 83 (21), 68 (9), 67 (12), 66 (5), 56 (10), 55 (85), 54 (10), 53 (19), 52 (13), 51 (12), 50 (6), 43 (6), 42 (90), 41 (100).

**Treatment of 2-chloro-2-cyclopenten-1-one (1b) with cyanomethyllithium.** Treatment of **1b** (0.1131 g, 0.97 mmol) with cyanomethyllithium according to the general procedure gave 0.1274 g of a light yellow oil. GLC analysis of the crude product indicated two major compounds; **5b** (86.5%) and **6b** (13.5%). Purification by flash chromatography (Et2O-pentane, 4 : 1) afforded 2-chloro-1-cyanomethyl-2-cyclopenten-1-ol (**5b**) (0.0722 g, 47.5% yield) and a mixture of *cis* and *trans* 2-chloro-3-cyanomethyl-cyclopentanone **(6b*cis*** + **6b*trans***) (0.0132 g, 8.9% yield) as colorfree oils. The ratio of **6d*cis*** : **6d*trans*** was estimated to 2.9 : 1 by 1H NMR.

Spectroscopic data for 2-chloro-1-cyanomethyl-2-cyclopenten-1-ol (**5b**): HRMS found: *M* 157.0291. Calc. for C7H8ClNO: 157.0294; IR vmax (neat) 3430br.s, 2930m, 2850m, 2250m, 1650w, 1620m, 1450w, 1435w, 1415m, 1385m, 1320m, 1260w, 1220w, 1170m, 1130m, 1065s, 1005w, 970m, 950m, 940m, 910w, 890w, 840w cm-1; 1H NMR δ 2.13-2.25 (1H, m), 2.36-2.54 (5H, m), 2.66 (1H, part of an AB system, *J* 16.48), 2.80 (1H, part of an AB system, *J* 16.48), 5.98 (1H, t, *J* 2.20); 13C NMR δ 27.9, 28.0, 36.6, 82.1, 166.7, 131.4, 134.4; MS *m/z* 159 (*M*+2, 1%), 157 (*M*, 3), 139 (9), 119 (73), 117 (100), 104 (33), 102 (6), 101 (5), 99 (15), 91 (8), 89 (26), 88 (8), 87 (6), 82 (9), 81 (54), 80 (7), 78 (6), 77 (20), 76 (14), 75 (20), 74 (9), 73 (18), 68 (9), 67 (5), 66 (5), 65 (14), 64 (9), 63 (23), 62 (15), 61 (16), 60 (17), 55 (21), 54 (14), 53 (78), 52 (32), 50 (39), 49 (12), 43 (10), 42 (12), 41 (47);

Spectroscopic data for *cis* and *trans* 2-chloro-3-cyanomethylcyclopentanone (**6b*cis*** + **6b*trans***): HRMS found: *M* 157.0292. Calc. for C7H8ClNO: 157.0294; 1H NMR δ 1.82.2.05 (1H, m), 2.22-2.86 (6H, m), 2.98 (0.75H*cis*, d, *J* 11.72), 4.21 (0.25H*trans*, d, *J* 5.13); 13C NMR **6b*cis***: δ 20.3, 24.4, 35.0, 42.3, 63.1, 116.52, 206.92; **6b*trans***: δ 18.5, 24.9, 34.8, 39.2, 60.4, 116.50, 206.98; MS *m/z* 159 (*M*+2, 2%), 157 (*M*, 7), 122 (7), 101 (6), 89 (13), 77 (5), 76 (7), 75 (17), 66 (13), 65 (6), 64 (9), 63 (5), 62 (6), 56 (6), 55 (46), 54 (8), 53 (30), 52 (15), 51 (21), 50 (15), 49 (13), 48 (11), 43 (40), 42 (100), 41 (49).

**Treatment of 2-bromo-2-cyclopenten-1-one (1c) with cyanomethyllithium.** Treatment of **1c**, (0.1997 g, 1,24 mmol) with cyanomethyllithium according to the general procedure afforded 0.1763 g of a black oil. Purification by flash chromatography (Et2O-pentane = 1 : 1) gave 2-bromo-1-cyanomethyl-2-cyclopenten-1-ol (**5c**) (0.1150 g, 46.0% yield) as a colorfree oil which crystallized upon storage, mp 57-58 C. HRMS found: *M* 202.9785. Calc. for C7H881BrNO: 202.9769; IR vmax (KBr) 3440s, 2950w, 2900m, 2840w, 2225w, 1610m, 1420w, 1360m, 1290w, 1270w, 1160m, 1120w, 1060s, 965m, 940s, 900m, 850w, 720w, 665w, 540w cm-1; 1H NMR δ 2.14-2.25 (1H, m), 2.26 (1H, br.s), 2.35-2.56 (3H, m), 2.65 (1H, part of an AB system, *J* 16.48), 2.79 (1H, part of an AB system, *J* 16.48), 6.16 (1H, t, *J* 2.56); 13C NMR δ 28.8, 29.9, 36.0, 83.1, 116.5, 125.2, 136.0; MS *m/z* 203 (*M*+2, 2%), 201 (*M*, 2), 185 (8), 183 (8), 163 (96), 161 (100), 104 (25), 103 (5), 82 (57), 81 (29), 78 (5), 77 (18), 76 (7), 75 (5), 68 (5), 65 (5), 63 (7), 55 (9), 54 (6), 53 (61), 52 (11), 51 (26), 50 (16), 42 (4), 41 (9).

**Treatment of 2-methoxy-2-cyclopenten-1-one (1d) with cyanomethyllithium**. Treatment of **1d**, (0.1155 g, 1.03 mmol) with cyanomethyllithium according to the general procedure afforded 0.1431 of a yellow oil. Purification by flash chromatography (Et2O-pentane, 1 : 1) gave 1-cyanomethyl-2-methoxy-2-cyclopenten-1-ol (**5b**) (0.0948 g, 60.1% yield) as a colorfree oil. HRMS found: *M* 153.0780. Calc. for C8H11NO2: 153.0790; IR vmax (neat) 3400br.s, 3050w, 2930m, 2850m, 2250w, 1655s, 1460m, 1450m, 1410m, 1380m, 1350m, 1280m, 1250s, 1170m, 1110m, 1060s, 1020m, 990w, 960w, 940w, 850w, 780w, 750w, 670w cm-1; 1H NMR δ 2.03-2.14 (1H, m), 2.19-2.31 (2H, m), 2.33-2.42 (1H, m), 2.45 (1H, br.s), 2.63 (1H, part of an AB system, *J* 16.48), 2.73 (1H, part of an AB system, *J* 16.48), 3.65 (3H, s), 4.71 (1H, t, *J* 2.56); 13C NMR δ 24.6, 27.9, 36.3, 57.3, 79.6, 97.8, 117.3, 158.3; MS *m/z* 153 (*M*, 9%), 114 (7), 113 (100), 95 (5), 81 (12), 69 (5), 68 (5), 65 (5), 55 (13), 53 (13), 41 (9).

**Treatment of 2-pyrrolidinyl-2-cyclopenten-1-one (1e) with cyanomethyllithium.** Treatment of **1e** (01.015 g, 0.67 mmol) with cyanomethyllithium according to the general procedure afforded 0.0745 g of a dark brown oil. Purification by flash chromatography (Et2O-pentane, 4 : 1) gave 2-cyanomethyl-2-hydroxycyclopentanone (**16**) as a light yellow oil (0.0699 g, 79.7% yield). HRMS found: *M* 139.0644. Calc. for C7H9NO2 139.0633; IR vmax (neat) 3400br.s, 2950m, 2250w, 1750s, 1710w, 1450w, 1400w, 1300w, 1260w, 1160m, 1100m, 1040m, 1000m, 920w, 890w, 810w, 780w cm-1; 1H NMR δ 1.86-1.98 (1H, m), 2.06-2.20 (3H, m), 2.32-2.53 (2H, m), 2.56 (1H, part of an AB system, *J* 16.48), 2.66 (1H, part of an AB system, *J* 16.48), 2.82 (1H, br.s); 13C NMR δ 17.6, 25.4, 35.1, 35.3, 75.8, 116.0, 215.5; MS *m/z* 140 (*M*+1, 2%), 139 (*M*, 11), 111 (7), 110 (14), 99 (7), 96 (7), 84 (5), 83 (44), 81 (5), 71 (22), 68 (12), 57 (13), 56 (5), 55 (37), 53 (6), 44 (5), 43 (69), 42 (27), 41 (100).

**Treatment of 2-phenylthio-2-cyclopenten-1-one (1f) with cyanomethyllithium.** Treatment of **1f** (0.2352 g, 1.24 mmol) with cyanomethyllithium according to the general procedure given above afforded 0.2137 g of a crude yellow oil. GLC analysis of the crude product indicated two major products; **5f** (71.4%) and **6f** (24.7%) along with several unidentified compounds. Purification by flash chromatography (Et2O-pentane, 1 : 1) gave 1-cyanomethyl-2-phenylthio-2-cyclopenten-1-ol (**5f**) (0.1528 g, 57.1% yield) and a mixture of *cis* and *trans* 3-cyanomethyl-2-phenylthiocyclopentanone (**6f*cis*** and **6f*trans***) (0.0434 g, 16.2% yield) as a colorfree oils. The ratio of **6f*cis*** : **6f*trans*** was estimated to 6.1 : 1 by 1H NMR.

Spectroscopic data for 1-cyanomethyl-2-phenylthio-2-cyclopenten-1-ol (**5f**): *Elem. Anal.* found: C, 67.7; H, 5.8; N, 6.1. Calc. for C13H13NOS: C, 67.5; H, 5.7; N, 6.1; IR vmax (neat) 3410s, 3050m, 2920m, 2840m, 2240w, 1575w, 1470m, 1435m, 1410w, 1310m, 1160w, 1095m, 1065s, 1020w, 970w, 935w, 745s, 690 s cm-1; 1H NMR δ 2.13 (1H, s), 2.15-2.24 (1H, m), 2.38-2.57 (3H, m), 2.64 (1H, part of an AB system, *J* 16.48), 2.80 (1H, part of an AB system, *J* 16.48), 5.87 (1H, t, *J* 2.56), 7.26-7.37 (3H, m), 7.44- 7.51 (2H, m); 13C NMR δ 28.9, 29.8, 38.4, 84.3, 117.1, 128.2, 129.6, 132.2, 132.9, 136.7, 139.5; MS *m/z* 231 (*M*, 2%), 213 (15), 191 (5), 185 (5), 173 (6), 171 (5), 134 (5), 110 (9), 109 (41), 108 (10), 103 (11), 102 (5), 91 (5), 84 (5), 83 (5), 82 (8), 78 (22), 77 (81), 76 (18), 75 (12), 74 (10), 71 (22), 70 (5), 69 (19), 66 (5), 65 (29), 63 (13), 58 (7), 53 (8), 52 (16), 51 (100), 50 (33), 45 (19), 41 (27).

Spectroscopic data for *cis* and *trans* 3-cyanomethyl-2-phenylthiocyclopentanone (**6f*cis*** + **6f*trans***): *Elem. Anal.* found: C, 67.7; h, 6.1; N, 6.2. Calc. for C13H13NOS: C, 67.5; H, 6.1; N, 6.1; IR vmax (neat) 3450w, 3050w, 2950m, 2230m, 1750s, 1675m, 1475m, 1455m, 1435m, 1420m, 1400m, 1360w, 1300w, 1275w, 1200w, 1140m, 1080w, 1060w, 1020w, 920w, 850w, 750s, 690s cm-1; 1H NMR δ 1.71-1.84 (1H*cis*, m), 1.87-1.98 (1H*trans*, m), 2.07-2.37 (3H*cis* + 3H*trans*, m), 2.44-2.54 (1H*cis*, m), 2.58-2.68 (1H*cis* + 1H*trans*, m), 2.79-2.85 (1H*cis* + 1H*trans*, m), 3.18 (1H*cis*, d, *J* 10.98), 3.70 (1H*trans*, d, *J* 5.86), 7.26-7.36 (3H*cis* + 3H*trans*, m), 7.41-7.52 (2H*cis* + 2H*trans*, m); 13C NMR **6f*cis***: δ 21.0, 25.9, 36.9, 38.8, 58.5, 117.3, 128.8, 129.4, 131.7, 133.9, 211.5; **6f*trans*** δ 18.9, 26.0, 35.3, 38.2, 56.9, 118.1, 128.6, 129.5, 131.8, 133.0, 209.6; MS *m/z* 233 (*M*+2, 2%), 232 (*M*+1, 6), 231 (*M*, 40), 175 (23), 163 (10), 149 (6), 147 (8), 137 (6), 136 (49), 135 (27), 134 (11), 130 (49), 121 (9), 115 (6), 111 (5), 110 (19), 109 (62), 108 (9), 94 (5), 91 (9), 86 (5), 85 (13), 84 (5), 82 (7), 81 (7), 78 (18), 77 (53), 76 (7), 75 (6), 74 (7), 71 (11), 69 (16), 67 (10), 66 (16), 65 (35), 64 (6), 63 (7), 59 (5), 58 (9), 57 (5), 56 (13), 55 (47), 54 (67), 53 (25), 52 (15), 51 (49), 50 (19), 45 (23), 43 (6), 42 (74), 41 (100).

**Treatment of 2-phenylseleno-2-cyclopenten-1-one (1g) with cyanomethyllithium.** Treatment of **1g** (0.2040 g, 0.86 mmol) with cyanomethyl lithium according to the general procedure afforded 0.1878 g of a light brown oil. GLC analysis of the crude product indicated three major components; **1g** (4.7%) **5g** (68.2%) and **6g** (16.4%). Purification by flash chromatography (Et2O-pentane, 1 : 1) gave 1-cyanomethyl-2-phenylselenocyclopenten-1-ol (**5g**) (0.1148 g, 48.0% yield) and a mixture of *cis* and *trans* 3-cyanomethyl-2-phenylseleno-2-cyclopenten-1-ol (**6g*cis*** + **6g*trans***) (0.0337 g, 14.1% yield) as colorfree oils. The ratio of **6g*cis*** : **6g*trans*** was estimated to 5.6 : 1 by 1H NMR.

Spectroscopic data for 1-cyanomethyl-2-phenylselenocyclopenten-1-ol (**5g**): HRMS found: *M*+1 279.0158. Calc for C13H13NO80Se: 279.0162; IR vmax (neat) 3640br.s, 3550m, 2020m, 2840m, 2250w, 1720w, 1570m, 1475m, 1435m, 1410 m, 1370w, 1220w, 1160m, 1090m, 1065s, 1020w, 995w, 970m, 940m, 900w, 880w, 840w cm-1; 1H NMR δ 1.97 (1H, br.s), 2.12-2.24 (2H, m), 2.37-2.63 (3H, m), 2.57 (1H, part of an AB system, *J* 16.48), 2.75 (1H, part of an AB system, *J* 16.48),6.12 (1H, app.t, *J* 2.56 Hz), 7.27-7-32 (3H, m), 7.53-7.60 (2H, m); 13C NMR δ 29.3, 31.0, 37.7, 85.2, 117.1, 128.2, 128.5, 129.7, 133.5, 134.0, 141.3; MS *m/z* 279 (*M*+1, 2%), 261 (15), 259 (8), 221 (5), 219 (6), 182 (5), 181 (24), 180 (43), 178 (5), 159 (9), 158 (10), 157 (37), 156 (9), 155 (20), 154 (19), 153 (29), 152 (13), 141 (27), 140 (4), 139 (5), 131 (5), 130 (5), 129 (5), 128 (10), 127 (5), 119 (15), 117 (21), 116 (10), 115 (26), 105 (7), 102 (24), 103 (27), 102 (13), 93 (10), 91 (12), 89 (5), 78 (43), 77 (100), 76 (29), 75 (16), 74 (11), 65 (15), 64 (6), 63 (15), 62 (5), 62 (5), 53 (11), 52 (14), 51 (80), 50 (31), 40 (14).

Spectroscopic data for *cis* and *trans* 3-cyanomethyl-2-phenylseleno-2-cyclopenten-1-ol (**6g*cis*** + **6g*trans***): HRMS found: *M*+1 279.0158. Calc. for C13H13NO80Se: 279.0162; IR vmax (neat) 3005m, 2995m, 2245m, 1745s, 1730s, 1575m, 1475s, 1460m, 1440s, 1420m, 1400m, 1275m, 1190m, 1160m, 1135s, 1065m, 1050m, 1020m, 1000w, 740s, 690s cm-1; 1H NMR δ 1.71-1.82 (1H*cis* + 1H*trans*, m), 1.97-2.11 (1H*cis*, m), 2.18-2.34 (2H*cis* + 2H*trans*, m), 2.38-2.48 (1H*cis*, m), 2.48-2.80 (4H*trans*, m), 2.56 (1H*cis*, dd, *J* 6.59, *J* 16.84), 3.69 (1H*cis*, dd, *J* 4.39, *J* 16.84), 3.31 (1H*cis*, d, *J* 9.52), 3.79 (1H*trans*, d, *J* 5.49), 7.25-7.37 (3H*cis* + 3H*trans*), 7.57-7.62 (2H*cis* + 2H*trans*); 13C NMR **6g*cis*** δ 21.2, 26.8, 37.0, 39.5, 51.8, 117.3, 126.2, 129.2, 129.5, 136.1, 212.1; **6g*trans*** δ 21.0, 30.5, 35.8, 38.6, 52.9, 118.1, 126.4, 129.1, 129.6, 135.7, 210.4; MS *m/z* 281 (*M*+3, 7%), 279 (*M*+1, 37), 277 (27), 276 (7), 275 (7), 211 (5), 186 (6), 185 (6), 184 (35), 183 (17), 182 (23), 181 (14), 180 (12), 171 (8), 170 (7), 169 (6), 160 (5), 159 (14), 158 (28), 157 (68), 156 (22), 155 (36), 154 (19), 153 (14), 143 (15), 133 (8), 130 (11), 129 (14), 128 (6), 122 (11), 117 (18), 116 (14), 115 (28), 105 (7), 104 (11), 103 (7), 102 (5), 94 (20), 93 (10), 91 (15), 83 (17), 82 (6), 81 (7), 80 (5), 79 (6), 78 (62), 77 (100), 76 (12), 75 (8), 74 (7), 67 (35), 66 (15), 65 (27), 64 (5), 63 (7), 55 (24), 54 (9), 53 (25), 52 (11), 51 (49), 50 (20), 42 (6), 41 (19), 40 (8).
